# Supplementary material
Source: Springer Nature journal article supplement (https://www.springermedizin.de/resource/supplementary/12931_2011_1178_MOESM2_ESM.pdf/9425482)

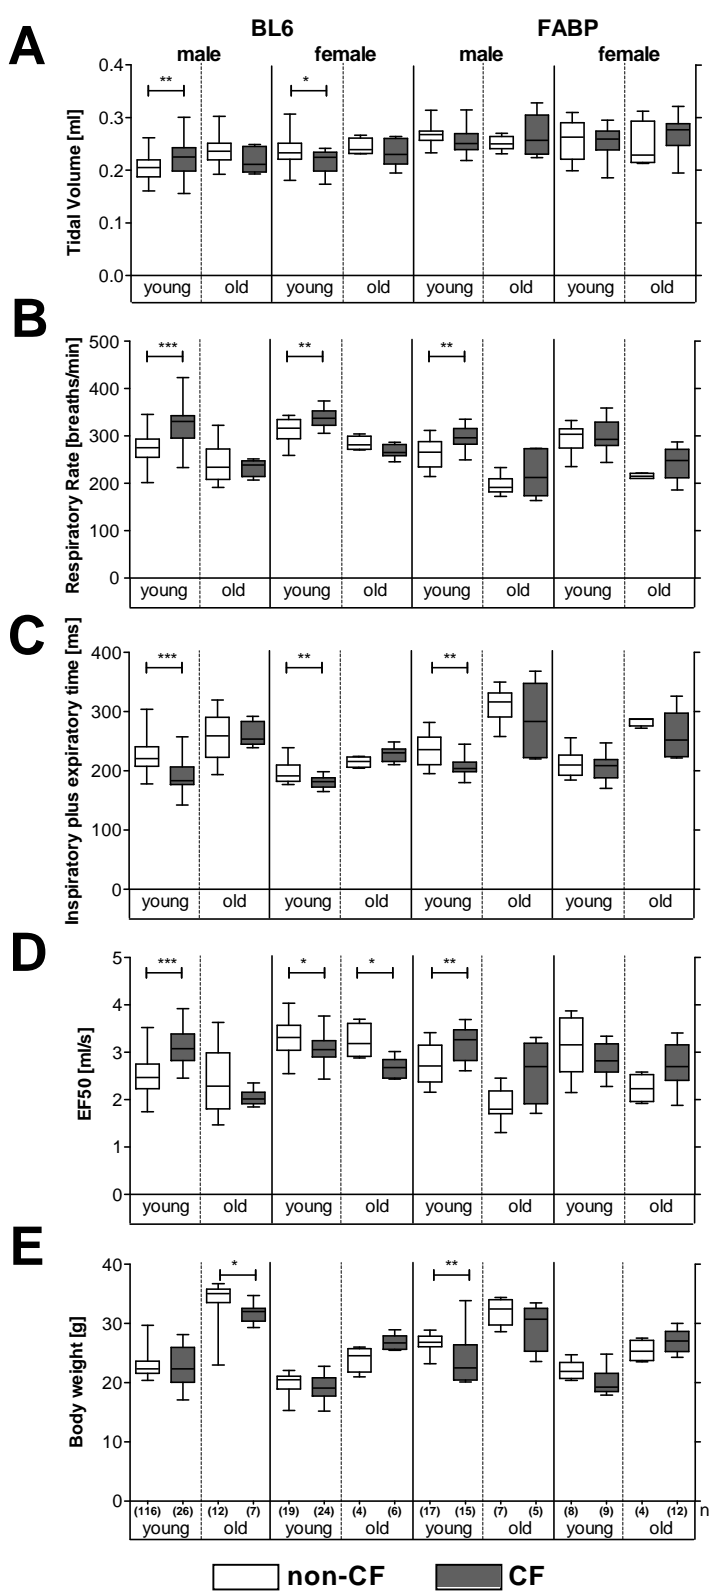

Supplement: MOESM2 [file 9425482]
